# Supplementary material for: Single‐Cell RNA‐Seq Reveals Injuries in Aortic Dissection and Identifies PDGF Signalling Pathway as a Potential Therapeutic Target
Source: PubMed Central journal article supplement (PMC11669114; doi:10.1111/jcmm.70293), 2024-12-25
Supplement: JCMM-28-e70293-s001.pdf [file JCMM-28-e70293-s001.pdf]

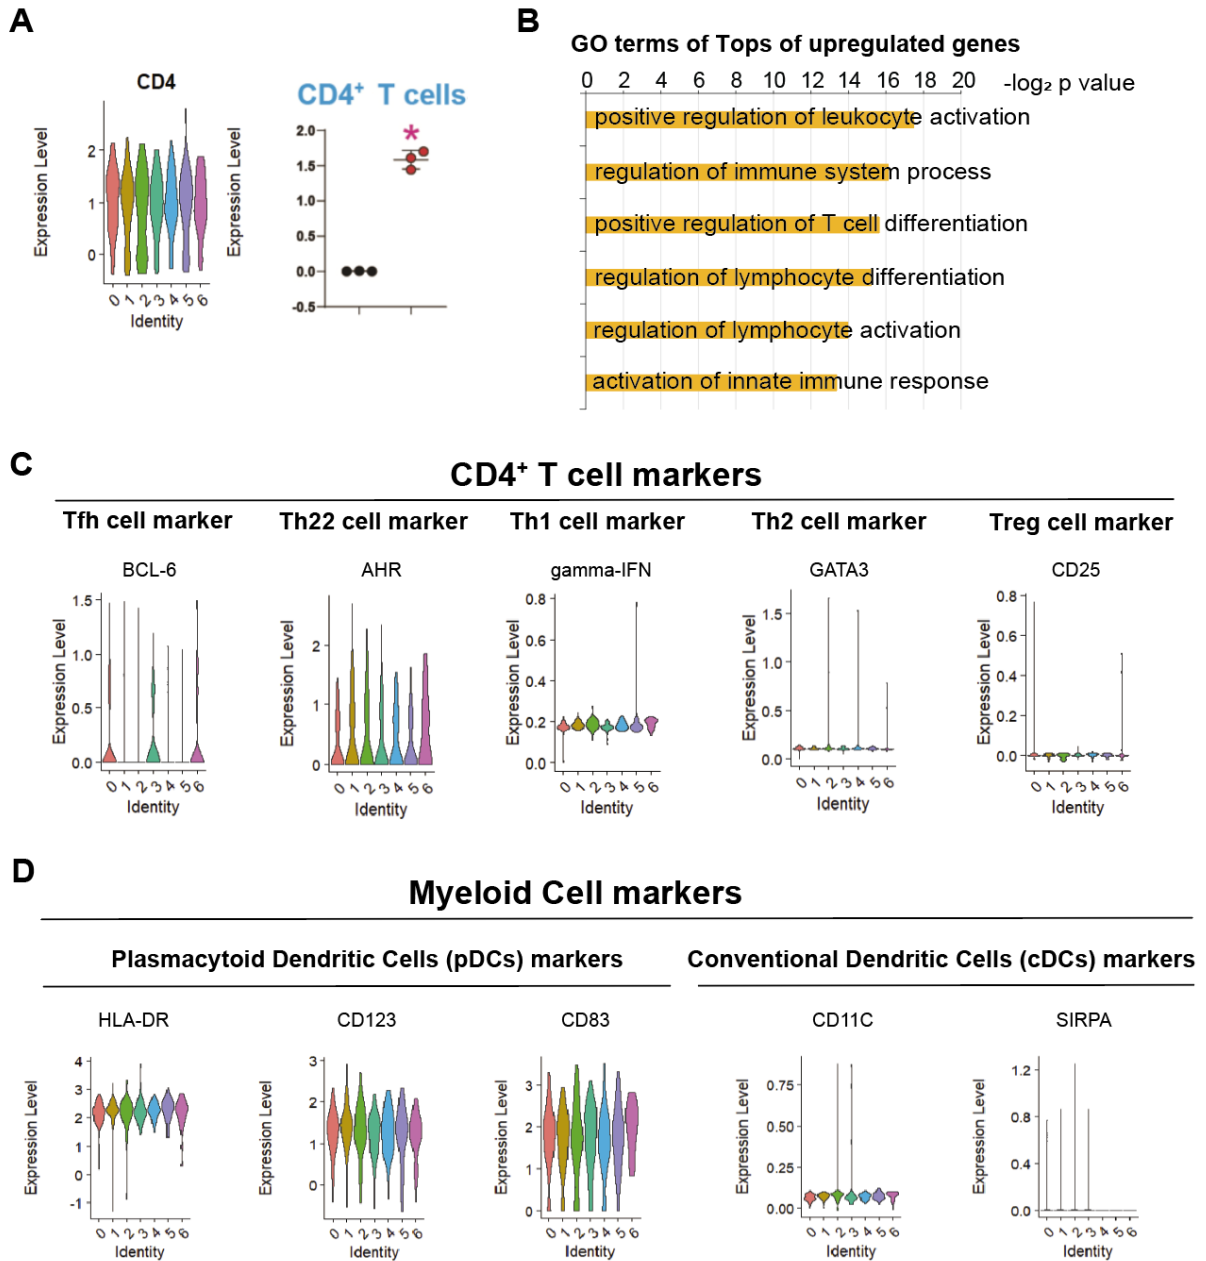

**Supplemental Figure 1 Subcellular reclustering and signaling pathway enrichment analysis of CD4<sup>+</sup> immune T cells**

- (A) The expression level of CD4<sup>+</sup> T cells.
- (B) Gene ontology (GO) analysis indicated significant enrichment processes.
- (C) The expression of typical CD4<sup>+</sup> T cell markers.
- (D) The expression of myeloid cell markers, such as those associated with Dendritic Cells (pDCs).

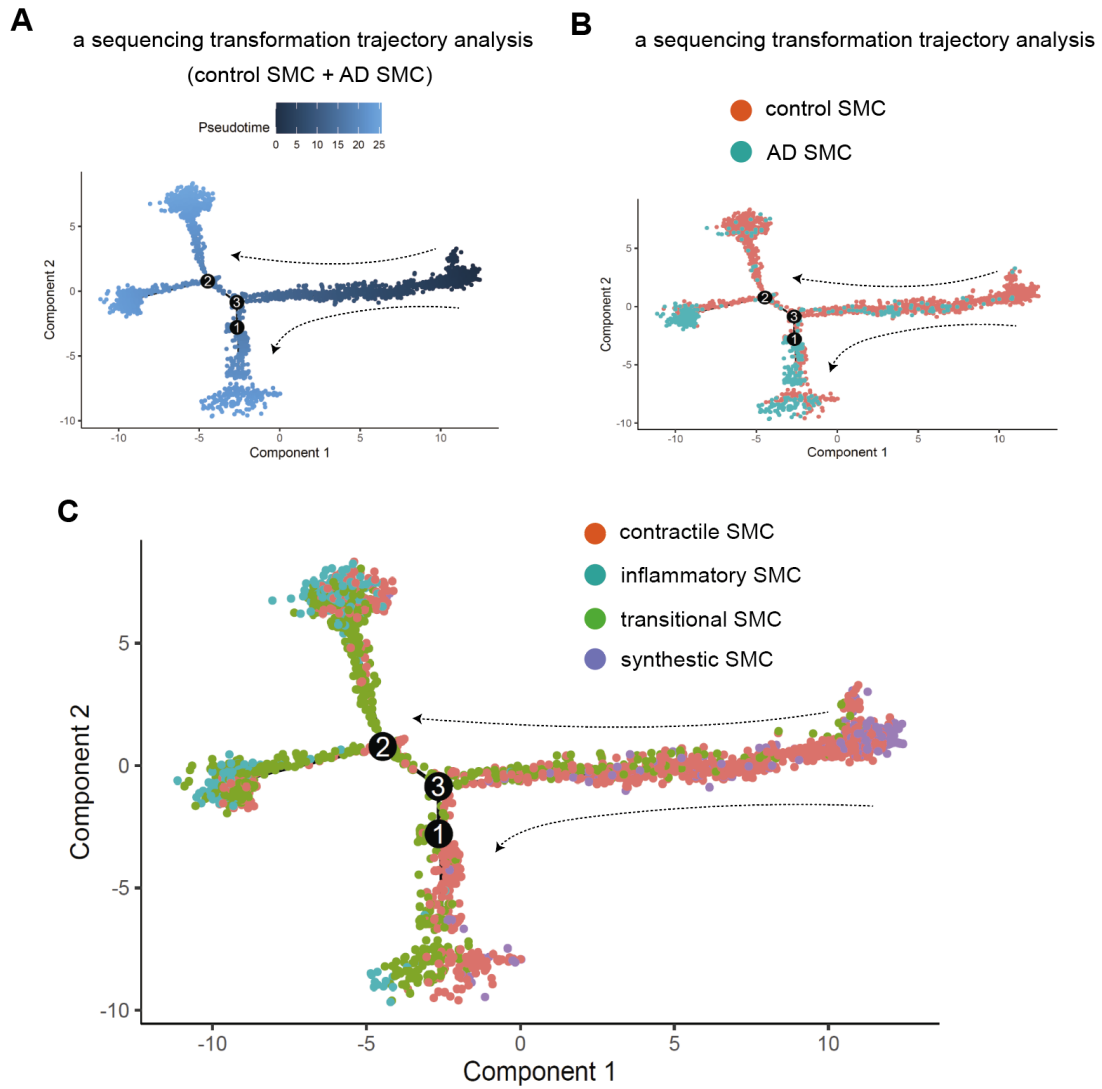

**Supplemental Figure 2 Sequencing transformation trajectory analysis of SMC**

(A) Sequencing transformation trajectory analysis of control-SMC and AD-SMC.

(B) The differences in cell transformation between AD-SMC and control-SMC.

(C) Detailed analysis based on gene expression profiles of different type of SMC.

GO biological process complete

| events                                              | P value  | FDR      |
|-----------------------------------------------------|----------|----------|
| response to oxidative stress                        | 2.20E-05 | 4.93E-04 |
| detoxification of inorganic compound                | 3.34E-04 | 5.52E-03 |
| detoxification                                      | 7.08E-04 | 1.05E-02 |
| positive regulation of T cell mediated cytotoxicity | 4.43E-03 | 4.68E-02 |

response to oxidative stress

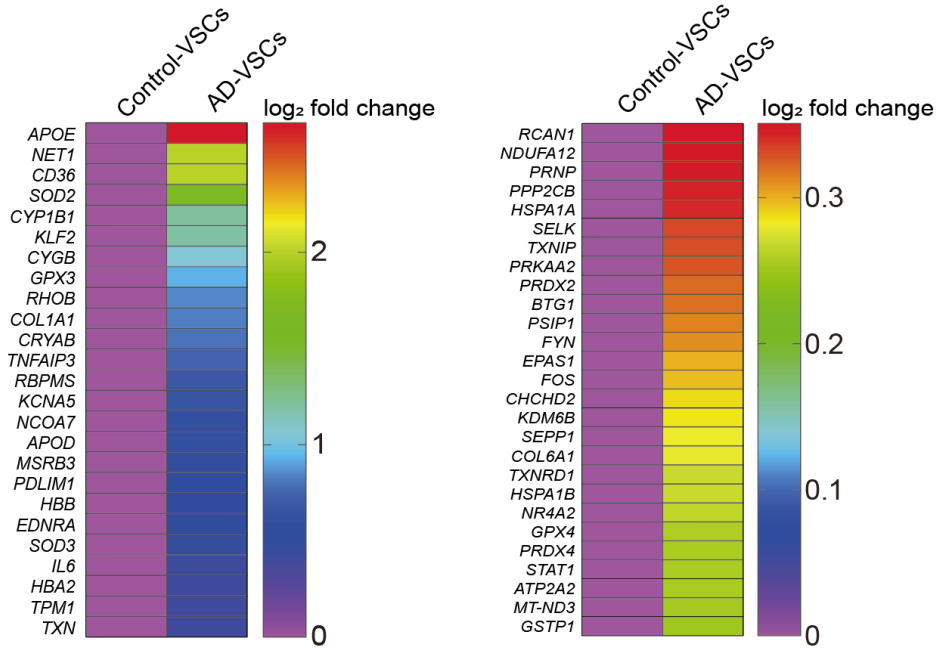

Supplemental Figure 3 The heat map of the expression levels of genes involved in oxidative stress events in AD
